# Supplementary material for: Grass–Legume Mixtures Show Potential to Increase Above- and Belowground Biomass Production for Andean Forage-Based Fallows
Source: MDPI journal article supplement (doi:10.3390/agronomy12010142), 2022-01-07

## Supplemental Materials

**Title:** Grass-legume mixtures increase above and belowground biomass production in Andean forage-based fallows

**Authors:**

Katherin Meza<sup>a,b</sup> (kmezaretamozo@gmail.com)

Steven J. Vanek<sup>a</sup> (stevanek4@gmail.com)

Yulissa Sueldo<sup>c</sup> (jusual24@gmail.com)

Edgar Olivera<sup>b</sup> (yanapaihyo@yahoo.com)

Raúl Ccanto<sup>b</sup> (raulccanto@yahoo.com.pe)

Maria Scurrah<sup>b</sup> (scurrah@gmail.com)

Steven J. Fonte<sup>a</sup> (steven.fonte@colostate.edu)

<sup>a</sup> Department of Soil and Crop Sciences, Colorado State University, Fort Collins, CO 80523, USA

<sup>b</sup> Grupo Yanapai, Junín, Peru

<sup>c</sup> Universidad Nacional de Huancavelica, Acobamba, Peru

**Table S1.** Relative Yield Total (RYT) for bicultures based on total biomass, roots, and shoots. ANOVA results for each major factor (grasses, legume, and soil) with their corresponding interactions are presented at the bottom, with significant values in bold (p-value<0.05). Mean LER values are presented with their corresponding standard errors (SE) to the right of each mean.

| Treatments <sup>a</sup>          | RYT          |      |              |      | Root RY      |      |              |      | Shoot RY     |      |              |      |
|----------------------------------|--------------|------|--------------|------|--------------|------|--------------|------|--------------|------|--------------|------|
|                                  | Quilcas      |      | Castillapata |      | Quilcas      |      | Castillapata |      | Quilcas      |      | Castillapata |      |
|                                  | Mean         | SE   |
| OATS/VETCH                       | 1.91         | 0.31 | 1.74         | 0.32 | 2.29         | 0.65 | 1.80         | 0.30 | 1.85         | 0.30 | 1.74         | 0.32 |
| RYEG/VETCH                       | 1.18         | 0.05 | 2.03         | 0.49 | 1.00         | 0.08 | 1.66         | 0.33 | 1.27         | 0.06 | 2.18         | 0.55 |
| FELO/VETCH                       | 1.89         | 0.37 | 2.75         | 0.53 | 1.18         | 0.10 | 2.10         | 0.43 | 2.04         | 0.46 | 3.05         | 0.79 |
| BROM/VETCH                       | 1.95         | 0.16 | 1.55         | 0.33 | 1.14         | 0.11 | 1.35         | 0.32 | 2.04         | 0.18 | 1.58         | 0.33 |
| ORCH/VETCH                       | 2.36         | 0.17 | 1.40         | 0.28 | 2.21         | 0.39 | 1.36         | 0.36 | 1.88         | 0.23 | 1.31         | 0.28 |
| OATS/REDC                        | 1.74         | 0.11 | 1.51         | 0.57 | 2.14         | 0.28 | 1.22         | 0.40 | 1.69         | 0.12 | 1.56         | 0.62 |
| RYEG/REDC                        | 1.38         | 0.37 | 1.55         | 0.22 | 1.27         | 0.26 | 1.16         | 0.10 | 1.46         | 0.44 | 1.68         | 0.38 |
| FELO/REDC                        | 1.25         | 0.34 | 1.05         | 0.20 | 1.52         | 0.43 | 0.86         | 0.14 | 1.12         | 0.30 | 0.97         | 0.11 |
| BROM/REDC                        | 1.00         | 0.33 | 0.72         | 0.13 | 1.15         | 0.34 | 0.75         | 0.20 | 0.97         | 0.33 | 0.75         | 0.10 |
| ORCH/REDC                        | 1.23         | 0.47 | 1.09         | 0.42 | 1.36         | 0.45 | 1.05         | 0.45 | 1.18         | 0.48 | 0.92         | 0.35 |
| OATS/MELU                        | 1.72         | N/A  | 1.11         | 0.33 | 3.11         | N/A  | 1.41         | 0.52 | 1.51         | N/A  | 1.06         | 0.34 |
| RYEG/MELU                        | 1.09         | 0.16 | 1.07         | 0.19 | 0.84         | 0.03 | 1.15         | 0.13 | 1.26         | 0.28 | 1.06         | 0.23 |
| FELO/MELU                        | 0.78         | 0.12 | 1.64         | 0.42 | 0.54         | 0.12 | 1.42         | 0.21 | 0.89         | 0.19 | 1.87         | 0.52 |
| BROM/MELU                        | 2.57         | 1.62 | 2.24         | 0.51 | 2.28         | 1.21 | 2.51         | 1.04 | 2.65         | 1.73 | 2.22         | 0.42 |
| ORCH/MELU                        | 1.68         | 0.26 | 1.30         | 0.40 | 1.27         | 0.25 | 1.37         | 0.36 | 1.81         | 0.40 | 1.29         | 0.40 |
| OATS/ALFA                        | 1.48         | 0.44 | 1.40         | 0.25 | 1.61         | 0.54 | 1.73         | 0.52 | 1.47         | 0.42 | 1.35         | 0.21 |
| RYEG/ALFA                        | 1.23         | 0.16 | 0.83         | 0.17 | 0.89         | 0.13 | 0.90         | 0.20 | 1.46         | 0.20 | 0.81         | 0.15 |
| FELO/ALFA                        | 1.18         | 0.63 | 1.69         | 0.41 | 1.24         | 0.68 | 1.91         | 0.25 | 1.15         | 0.61 | 1.69         | 0.54 |
| BROM/ALFA                        | 0.73         | 0.08 | 1.02         | 0.37 | 0.85         | 0.16 | 1.84         | 0.91 | 0.71         | 0.07 | 0.90         | 0.31 |
| ORCH/ALFA                        | 0.84         | 0.54 | 0.91         | 0.17 | 0.67         | 0.44 | 1.58         | 0.54 | 0.94         | 0.61 | 0.76         | 0.12 |
| <b>All Mixtures <sup>b</sup></b> |              |      |              |      |              |      |              |      |              |      |              |      |
| Legume                           | <b>0.001</b> |      |              |      | 0.118        |      |              |      | <b>0.001</b> |      |              |      |
| Grass                            | 0.629        |      |              |      | <b>0.049</b> |      |              |      | 0.579        |      |              |      |
| Soil                             | 0.966        |      |              |      | 0.679        |      |              |      | 0.882        |      |              |      |

|                       |       |       |       |
|-----------------------|-------|-------|-------|
| Legume x Grass        | 0.169 | 0.465 | 0.137 |
| Legume x Soil         | 0.898 | 0.057 | 0.968 |
| Grass x Soil          | 0.145 | 0.15  | 0.131 |
| Legume x Grass x Soil | 0.813 | 0.766 | 0.865 |

#### Perennial Mixtures <sup>c</sup>

|                       |       |       |              |
|-----------------------|-------|-------|--------------|
| Legume                | 0.069 | 0.572 | <b>0.028</b> |
| Grass                 | 0.985 | 0.659 | 0.908        |
| Soil                  | 0.623 | 0.192 | 0.918        |
| Legume x Grass        | 0.162 | 0.261 | 0.176        |
| Legume x Soil         | 0.836 | 0.057 | 0.944        |
| Grass x Soil          | 0.509 | 0.939 | 0.288        |
| Legume x Grass x Soil | 0.789 | 0.805 | 0.757        |

<sup>a</sup> OATS=oats (*Avena sativa*; cv. Mantaro 15M), RYEG=ryegrass (*Lolium multiflorum*; cv. Tama), FELO=Festulolium (*Lolium x Festuca genera*), BROM=brome grass (*Bromus catharticus*), ORCH=orchardgrass (*Dactylis glomerata*), VETCH=vetch (*Vicia dasycarpa*), REDC = red clover (*Trifolium pratense*), MELU = black medic (*Medicago lupulina*), ALFA = alfalfa (*Medicago sativa*; cv. Ranger).

<sup>b</sup> P\_values based on treatments involving all species, whether annular/perennial (grasses and legume)

<sup>c</sup> P\_values based on treatments for perennial species only (grasses and legume).

**Table S2.** Root and shoot biomass of separate grass and legume components in each treatment.

| Treatments <sup>a</sup> | Root dry biomass (g Pot <sup>-1</sup> ) |       |      |        |      |              |      |        |      |       | Shoot dry biomass (g Pot <sup>-1</sup> ) |        |      |       |              |        |      |  |
|-------------------------|-----------------------------------------|-------|------|--------|------|--------------|------|--------|------|-------|------------------------------------------|--------|------|-------|--------------|--------|------|--|
|                         | Quilcas                                 |       |      |        |      | Castillapata |      |        |      |       | Quilcas                                  |        |      |       | Castillapata |        |      |  |
|                         | n                                       | Grass | SE   | Legume | SE   | Grass        | SE   | Legume | SE   | Grass | SE                                       | Legume | SE   | Grass | SE           | Legume | SE   |  |
| OATS/VETCH              | 4                                       | 4.39  | 1.31 | 0.28   | 0.09 | 0.83         | 0.35 | 0.57   | 0.23 | 19.81 | 2.16                                     | 3.85   | 0.34 | 6.43  | 2.40         | 5.18   | 0.24 |  |
| RYEG/VETCH              | 4                                       | 4.71  | 0.83 | 0.16   | 0.05 | 3.39         | 0.78 | 0.13   | 0.05 | 8.83  | 1.36                                     | 1.88   | 0.25 | 7.30  | 1.88         | 2.63   | 0.26 |  |
| FELO/VETCH              | 4                                       | 2.58  | 1.05 | 0.48   | 0.22 | 2.40         | 0.53 | 0.39   | 0.08 | 8.44  | 3.67                                     | 7.81   | 0.77 | 5.54  | 1.55         | 5.85   | 0.36 |  |
| BROM/VETCH              | 4                                       | 0.34  | 0.11 | 0.66   | 0.10 | 0.16         | 0.01 | 0.50   | 0.29 | 1.24  | 0.57                                     | 12.18  | 0.11 | 0.83  | 0.12         | 5.86   | 0.86 |  |
| ORCH/VETCH              | 3                                       | 4.51  | 0.76 | 0.34   | 0.06 | 0.65         | 0.29 | 0.50   | 0.06 | 4.93  | 0.93                                     | 7.37   | 0.09 | 0.67  | 0.29         | 7.00   | 0.19 |  |
| OATS/REDC               | 4                                       | 4.69  | 0.62 | 0.09   | 0.05 | 0.75         | 0.25 | 0.11   | 0.04 | 24.73 | 2.21                                     | 0.26   | 0.16 | 6.89  | 3.16         | 0.27   | 0.12 |  |
| RYEG/REDC               | 3                                       | 6.95  | 1.30 | 0.12   | 0.05 | 2.12         | 0.27 | 0.13   | 0.02 | 12.60 | 3.75                                     | 0.13   | 0.11 | 5.47  | 1.36         | 0.25   | 0.03 |  |
| FELO/REDC               | 3                                       | 2.60  | 1.12 | 0.93   | 0.62 | 0.97         | 0.16 | 0.13   | 0.04 | 4.90  | 2.19                                     | 1.27   | 0.44 | 1.79  | 0.37         | 0.26   | 0.05 |  |
| BROM/REDC               | 4                                       | 1.05  | 0.31 | 0.36   | 0.29 | 0.12         | 0.06 | 0.10   | 0.03 | 5.04  | 1.06                                     | 0.70   | 0.28 | 0.39  | 0.19         | 0.23   | 0.10 |  |
| ORCH/REDC               | 3                                       | 2.09  | 1.11 | 0.60   | 0.17 | 0.62         | 0.31 | 0.20   | 0.08 | 3.62  | 1.59                                     | 0.74   | 0.31 | 0.82  | 0.35         | 0.32   | 0.11 |  |
| OATS/MELU               | 1                                       | 5.71  | N/A  | 0.12   | N/A  | 0.75         | 0.23 | 0.03   | 0.02 | 14.90 | N/A                                      | 0.41   | N/A  | 5.30  | 1.91         | 0.06   | 0.03 |  |

|           |   |      |      |      |      |      |      |      |      |       |      |      |      |      |      |      |      |
|-----------|---|------|------|------|------|------|------|------|------|-------|------|------|------|------|------|------|------|
| RYEG/MELU | 2 | 4.61 | 0.25 | 0.02 | 0.01 | 1.48 | 0.34 | 0.04 | 0.02 | 10.49 | 3.21 | 0.07 | 0.12 | 2.54 | 0.53 | 0.20 | 0.15 |
| FELO/MELU | 3 | 2.37 | 0.58 | 0.01 | 0.00 | 1.62 | 0.47 | 0.02 | 0.01 | 8.32  | 1.98 | 0.04 | 0.06 | 4.09 | 1.22 | 0.06 | 0.03 |
| BROM/MELU | 3 | 0.86 | 0.50 | 0.32 | 0.29 | 0.17 | 0.03 | 0.13 | 0.08 | 4.95  | 2.71 | 1.48 | 0.64 | 1.04 | 0.11 | 0.53 | 0.18 |
| ORCH/MELU | 3 | 3.15 | 1.08 | 0.03 | 0.03 | 0.62 | 0.07 | 0.05 | 0.03 | 5.32  | 0.82 | 0.44 | 0.32 | 0.97 | 0.15 | 0.27 | 0.20 |
| OATS/ALFA | 4 | 3.50 | 1.19 | 0.06 | 0.04 | 0.98 | 0.24 | 0.06 | 0.05 | 21.42 | 6.73 | 0.13 | 0.10 | 7.13 | 0.88 | 0.08 | 0.10 |
| RYEG/ALFA | 4 | 4.52 | 1.24 | 0.09 | 0.08 | 1.85 | 0.44 | 0.01 | 0.00 | 11.10 | 2.96 | 0.27 | 0.22 | 3.06 | 0.58 | 0.02 | 0.03 |
| FELO/ALFA | 3 | 2.64 | 1.46 | 0.44 | 0.38 | 2.05 | 0.09 | 0.07 | 0.03 | 5.19  | 2.64 | 0.74 | 0.34 | 3.52 | 0.94 | 0.16 | 0.16 |
| BROM/ALFA | 4 | 1.01 | 0.25 | 0.07 | 0.04 | 0.10 | 0.05 | 0.19 | 0.13 | 5.01  | 0.66 | 0.10 | 0.09 | 0.46 | 0.22 | 0.36 | 0.16 |
| ORCH/ALFA | 2 | 1.74 | 1.35 | 0.05 | 0.01 | 0.64 | 0.06 | 0.11 | 0.07 | 3.70  | 3.00 | 0.13 | 0.12 | 0.81 | 0.10 | 0.14 | 0.07 |
| OATS      | 4 | 2.29 | 0.68 |      |      | 0.74 | 0.28 |      |      | 15.79 | 3.63 |      |      | 5.65 | 1.36 |      |      |
| RYEG      | 4 | 6.08 | 1.36 |      |      | 2.24 | 0.82 |      |      | 9.01  | 1.58 |      |      | 3.89 | 1.36 |      |      |
| FELO      | 4 | 4.80 | 1.13 |      |      | 1.48 | 0.39 |      |      | 10.10 | 2.87 |      |      | 2.33 | 0.68 |      |      |
| BROM      | 3 | 1.35 | 0.18 |      |      | 0.22 | 0.07 |      |      | 8.06  | 1.27 |      |      | 0.92 | 0.35 |      |      |
| ORCH      | 4 | 2.88 | 0.64 |      |      | 0.85 | 0.33 |      |      | 4.44  | 0.83 |      |      | 1.33 | 0.35 |      |      |
| VETCH     | 4 |      |      | 0.74 | 0.11 |      |      | 0.83 | 0.20 |       |      | 9.80 | 0.73 |      |      | 8.63 | 0.08 |
| REDC      | 4 |      |      | 0.95 | 0.30 |      |      | 0.50 | 0.22 |       |      | 2.02 | 0.30 |      |      | 0.72 | 0.18 |
| MELU      | 4 |      |      | 0.20 | 0.08 |      |      | 0.08 | 0.03 |       |      | 0.73 | 0.30 |      |      | 0.49 | 0.26 |
| ALFA      | 4 |      |      | 0.64 | 0.39 |      |      | 0.14 | 0.11 |       |      | 1.17 | 0.30 |      |      | 0.89 | 0.40 |

<sup>a</sup> OATS=oats (*Avena sativa*; cv. Mantaro 15M), RYEG=ryegrass (*Lolium multiflorum*; cv. Tama), FELO= Festulolium (*Lolium* x *Festuca* genera), BROM=brome grass (*Bromus catharticus*), ORCH=orchardgrass (*Dactylis glomerata*), VETCH=vetch (*Vicia dasycarpa*), REDC = red clover (*Trifolium pratense*), MELU = black medic (*Medicago lupulina*), ALFA = alfalfa (*Medicago sativa*; cv. Ranger).

**Figure S1.** Mean total biomass production by treatment averaged across soil types. Error bars present the standard error of the mean and correspond to the original data (without transformation)

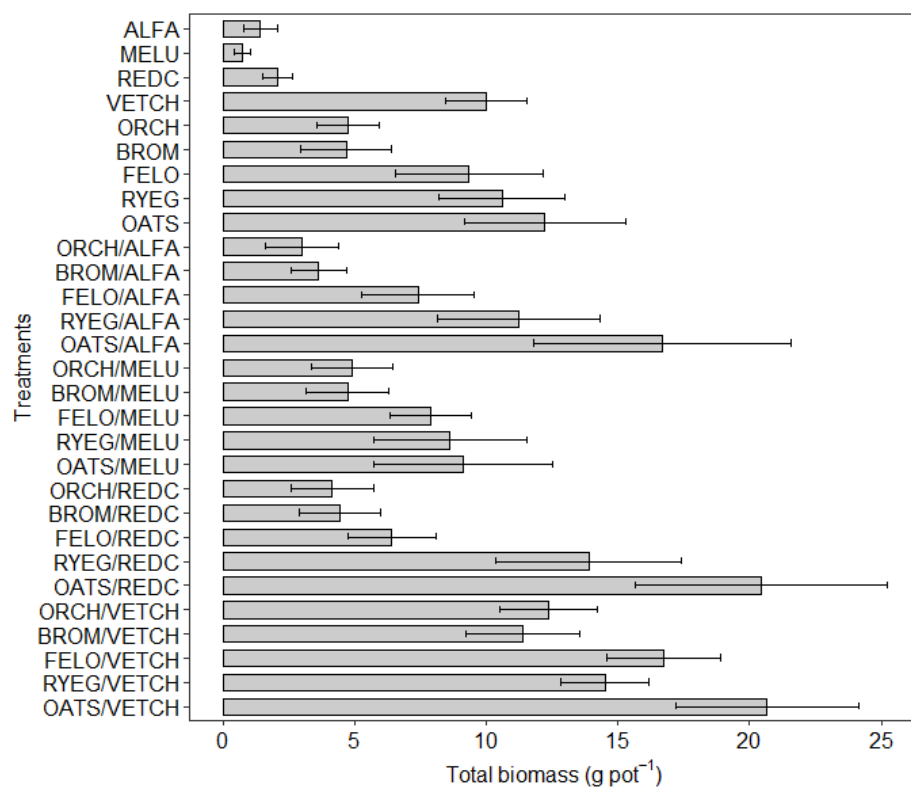

Supplement: s1 [file s1]
